# Supplementary material for: Structural analysis of 3’UTRs in insect flaviviruses reveals novel determinants of sfRNA biogenesis and provides new insights into flavivirus evolution
Source: PubMed Central journal article supplement (PMC8917146; doi:10.1038/s41467-022-28977-3), 2022-03-11
Supplement: 41467_2022_28977_MOESM1_ESM.pdf [file 41467_2022_28977_MOESM1_ESM.pdf]

Effect of XRN-1 knock-down on the production of sfRNAs in ISF-infected Aag2 cells. Band intensity on Northern blots (Fig 1B) was determined using digital densitometry, and the percentage of sfRNA production in cells transfected with dsRNA for XRN1 relative to those transfected with GFP dsRNA was calculated. The values are the means of three (A, B) or two (C) independent experiments with error bars indicating for SD (A, B) or SEM (C).

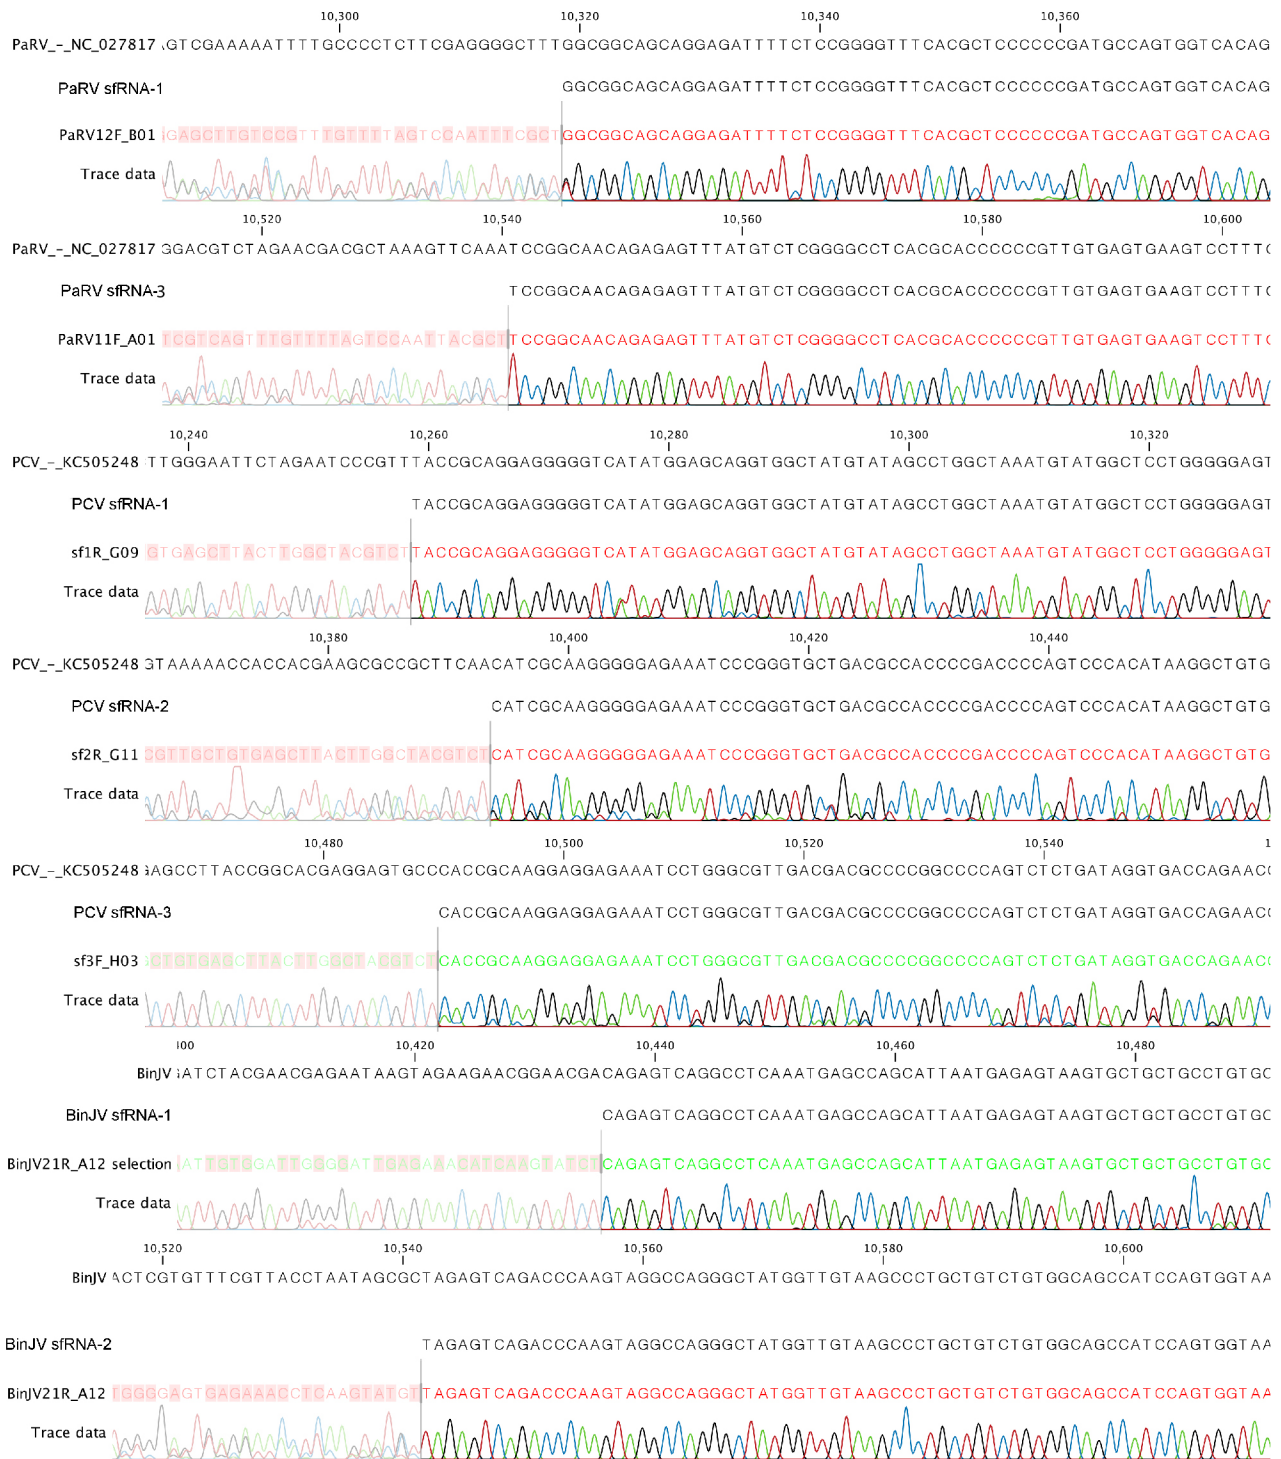

**Supplementary figure 3. Sequence alignments showing 5'-ends of ISF sfRNAs.** C6/36 cells were infected with PaRV, PCV or BinJV at MOI=1, and total RNA was isolated at 7dpi. RNA was then incubated with RNA-ligase I, which led to the circularisation of 5'-monophosphorylated uncapped RNA (sfRNA) but not capped viral genomic RNA. After ligation reaction, RNA was used for first-strand cDNA synthesis with a reverse primer designed to the 3'-end of viral UTR, followed by PCR amplification with back-to-back primers designed within the last 100nt of 3'UTRs. PCR products were gel-purified, and Sanger sequenced. The resulting sequences were aligned to genomic reference sequences, and 5'-ends of sfRNAs were identified as the first nucleotides downstream of the known 3'-terminal nucleotides in the amplicon's circularised molecules.

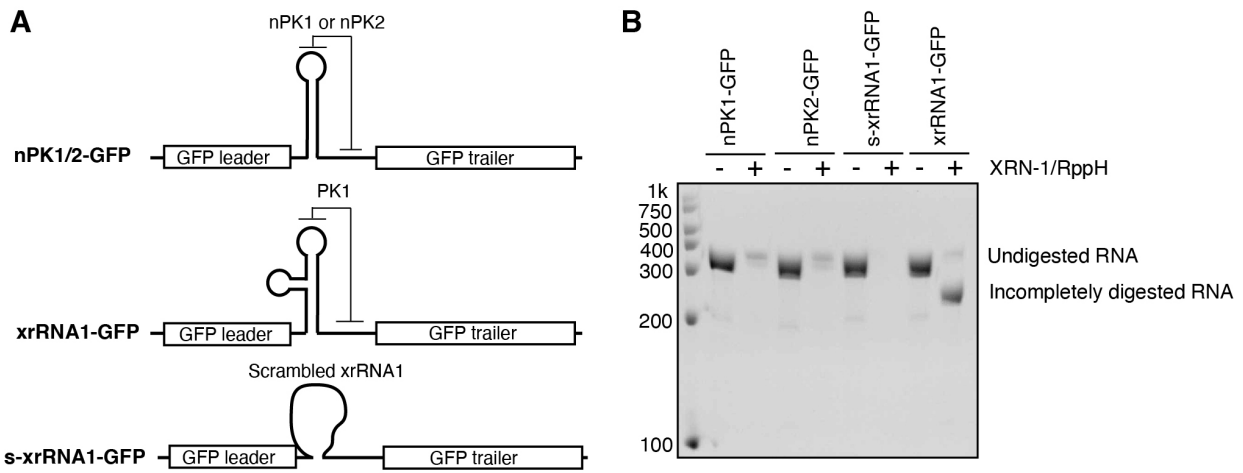

**Supplementary figure 4. XRN1 resistance assay of BinJV novel pseudoknots. (A)** Schematic representation of the RNA constructs used for assessing the XRN1 resistance of novel pseudoknots (nPKs) of BinJV. **(B)** *In vitro* XRN1 resistance assay with RNA constructs containing novel PKs or conventional xrRNA of BinJV. RNA constructs shown in **(A)** were *in vitro* transcribed and refolded at 28C. Samples were then treated purified XRN1 and RppH and analysed by electrophoresis in denaturing PAAG. Gels were stained with ethidium bromide. The experiment was repeated twice with similar results.

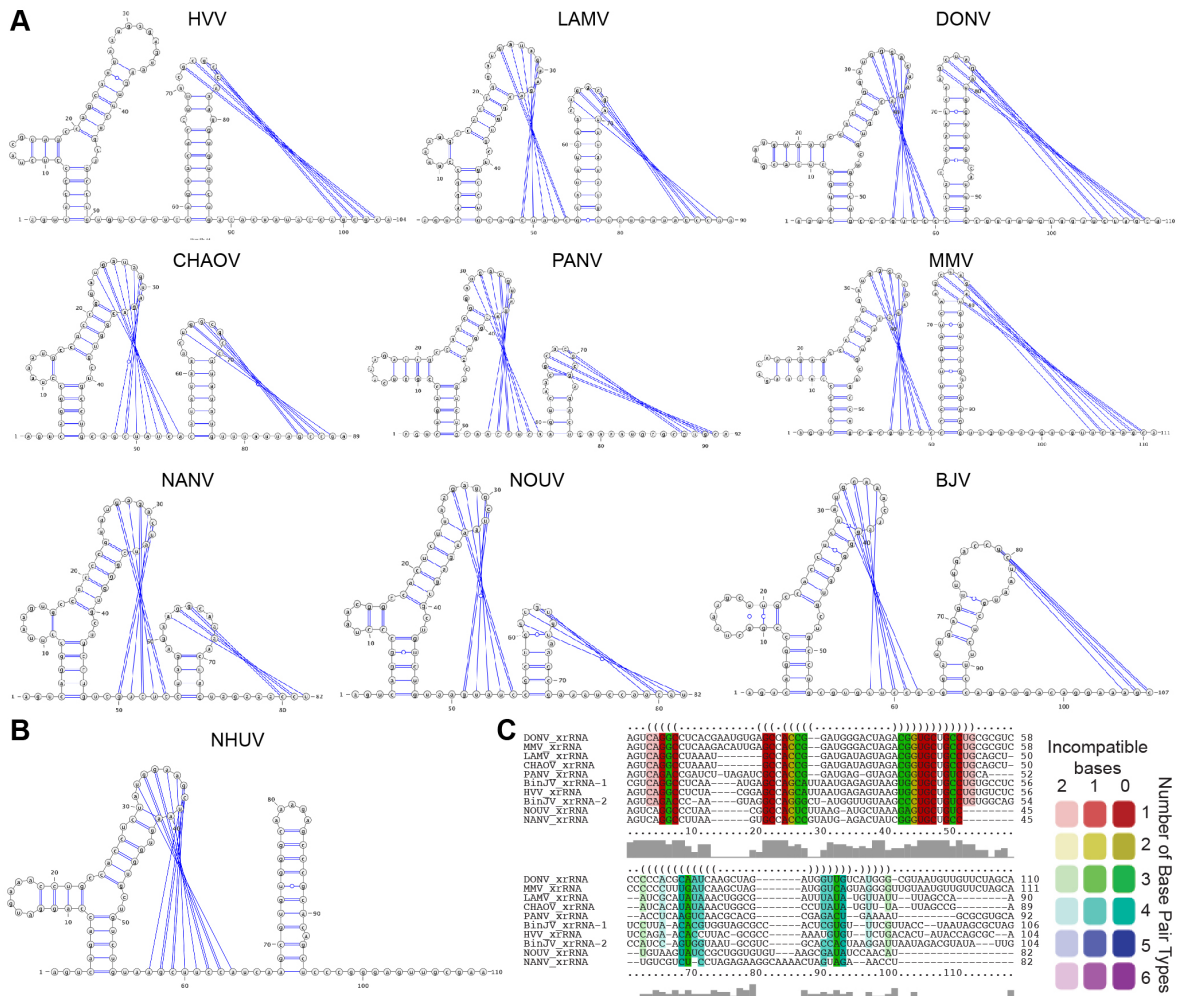

**Supplementary figure 5. Conserved secondary structures of dISF xrRNAs. (A)** Predicted secondary structures of dISF xrRNAs that form novel PK. **(B)** Predicted secondary structure of Nhumirim virus. In (A, B), putative xrRNAs were located in 3'UTRs of dISFs based on sequence homology with BinJV xrRNAs. Secondary structures and pseudoknots were predicted using the IPknot web server. **(C)** Alignment of sequence and structure of dISF 3'UTR regions containing classical and novel xrRNAs. Structural constraints for alignments were specified based on experimental data (BinJV) or IP-knot prediction (other dISFs).





**Supplementary Table 1. Virus acronym, names and Accession IDs for constructing multiple sequence alignment of flavivirus polyprotein and 3'UTRs.**

| Clade          | Virus | Virus name                                   | GenbankID 3'UTR | GenbankID      |
|----------------|-------|----------------------------------------------|-----------------|----------------|
| Anopheles clSF | AnFV  | Anopheles flavivirus                         | KX148546.1      | AOR51358.1     |
|                | KRBV  | Karumba virus                                | KY460522.1      | ARD06143.1     |
| clSF           | AeFV  | Aedes flavivirus                             | KC181923.1      | AGJ91136.1     |
|                | CFAV  | Cell fusing agent virus                      | MH237596.1      | AWK27463.1     |
|                | CTFV  | Culex theileri flavivirus                    | HE574574.1      | CCC55433.1     |
|                | CxFV  | Culex flavivirus                             | NC_008604.2     | YP_899469.2    |
|                | KRV   | Kamiti River virus                           | NC_005064.1     | NP_891560.1    |
|                | MFV   | Mosquito flavivirus                          | NC_021069.1     | YP_007877501.1 |
|                | NIEV  | Nienokoue virus                              | JQ957875.2      | AGE00070.1     |
|                | PaRV  | Parramatta River virus                       | NC_027817.1     | YP_009164029.1 |
|                | PCV   | Palm Creek virus                             | This study      | AGG76014.1     |
|                | QBV   | Quang Binh virus                             | NC_012671.1     | YP_002884239.1 |
| dlSF           | BinJV | Binjari virus                                | This study      | AYD42175.1     |
|                | CHAOV | Chaoyang virus                               | NC_017086.1     | YP_005454257.1 |
|                | DONV  | Donggang virus                               | NC_016997.1     | YP_005352889.1 |
|                | HVV   | Hidden valley virus                          | This study      | QID19998.1     |
|                | LAMV  | Lammi virus                                  | FJ606789.2      | ACR56717.1     |
|                | MMV   | Marisma mosquito virus                       | MF139576.1      | ATD87259.1     |
|                | NANV  | Nanay virus                                  | NC_040610.1     | YP_009552278.1 |
|                | NHUV  | Nhumirim virus                               | KJ210048.1      | AHW82954.1     |
|                | NOUV  | Nounane virus                                | NC_033715.1     | YP_009345019.1 |
|                | PANV  | Panmunjeom flavivirus                        | KY072986.1      | APB62586.1     |
| MBF            | ALFV  | Alfuy virus                                  | AY898809.1      | AAX82481.1     |
|                | BAGV  | Bagaza virus                                 | MF380433.1      | AWA45344.1     |
|                | BgV   | Bamaga virus                                 | MH257544.1      | YP_009345036.1 |
|                | BSQV  | Bussuquara virus                             | AY632536.4      | AAV34152.1     |
|                | DENV1 | Dengue fever virus 1                         | MH921567.1      | AYP31257.1     |
|                | DENV2 | Dengue fever virus 2                         | MT180479.1      | QIJ58805.1     |
|                | DENV3 | Dengue fever virus 3                         | MT261978.1      | QIS48879.1     |
|                | DENV4 | Dengue fever virus 4                         | MF004387.1      | AVY51410.1     |
|                | FRV   | Fitzroy River Virus                          | KM361634.1      | AKH03452.1     |
|                | IGUV  | Iguape virus                                 | AY632538.4      | AAV34154.1     |
|                | ILHV  | Ilheus virus                                 | KC481679.1      | AGJ84083.1     |
|                | ITV   | Israel turkey meningoencephalomyelitis virus | KC734553.1      | AGV15509.1     |
|                | JEV   | Japanese encephalitis virus                  | MH385014.1      | AYR00627.1     |
|                | KOKV  | Kokobera virus                               | NC_009029.2     | YP_001040007.1 |
|                | KOUV  | Koutango virus                               | MN057643.1      | QGV13462.1     |
|                | MVEV  | Murray Valley encephalitis virus             | MN933859.1      | QHQ71215.1     |
|                | NTAV  | Ntaya virus                                  | NC_018705.3     | YP_006846328.2 |
|                | ROCV  | Rocio virus                                  | MF461639.1      | ATG32103.1     |
|                | SEPV  | Sepik virus                                  | NC_008719.1     | YP_950478.1    |
|                | SLEV  | Saint Louis encephalitis virus               | MN233334.1      | QJW38944.1     |
|                | TMUV  | Tembusu virus                                | MN649267.1      | QIT08226.1     |
|                | USUV  | Usutu virus                                  | MG461313.1      | AXU25883.1     |
|                | WESSV | Wesselsbron virus                            | NC_012735.1     | YP_002922020.1 |
|                | WNV   | West Nile virus                              | MN849176.1      | QKN22593.1     |
|                | YFV   | Yellow fever virus                           | MN708497.1      | QGN18670.1     |
|                | ZIKV  | Zika virus                                   | MK105975.1      | AYU74865.1     |

**Supplementary Table 2. Oligonucleotides used in the study.**

|                                                               |                                                |
|---------------------------------------------------------------|------------------------------------------------|
| <b>Northern Blotting probes</b>                               |                                                |
| PaRV NB Probe                                                 | AGCGTAATTGGACTAAAACAAACTG                      |
| PCV NB probe                                                  | AGACGTAGCCAAGTAAGCTCACAG                       |
| KRBV NB Probe                                                 | GTTAAGGGAGGTGGCGCTGCTCACC                      |
| BinJV NB Probe                                                | AGATACTTGATGTTTCTCAATC                         |
| HVV NB Probe                                                  | ACTTGATGTTTCTCAATTCCAATCCAC                    |
| <b>siRNA Sequencing Primers</b>                               |                                                |
| KRBV_Lig_Seq_F                                                | GCGAGTAATGGTGGCAAAGGAGTTGGG                    |
| KRBV_Lig_seq_F                                                | GTTCCATCCAGTTTAGGATTGGTTGTGCAAGC               |
| KRBV_Lig_Seq_RT                                               | TCTCTCGTGACTCAATCTTTGCTTTTATTTTCACATTGTTAAGGG  |
| PCV_Lig_Seq_F                                                 | GGGCTTAGCCCAAGGTGAGTGACGA                      |
| PCV_Lig_Seq_R                                                 | TGTGTGCCCTCACCATTCTGGTGATC                     |
| PCV_Lig_Seq_RT                                                | AGACGTAGCCAAGTAAGCTCACAGCAACG                  |
| PaRV_Lig_Seq_F                                                | CCCGGTTGTGAAAACGATTGCGACTAGAA                  |
| PaRV_Lig_Seq_R                                                | GGGTGACGCTACTCACCTAGTTCGTT                     |
| PaRV_Lig_Seq_RT                                               | AGCGTAATTGGACTAAAACAAACTGACGAGCTCC             |
| BinJV-Lig_Seq_RT                                              | AGATACTTGATGTTTCTCAATCCCCAATCCACAATTATTCGG     |
| BinJV_Lig_Seq_F                                               | CGACACCTGGGAAAGACCGGAGATACC                    |
| BinJV_Lig_Seq_R                                               | ATATGATGCTCTACATTTTGAGGGGGTTCCTCT              |
| <b>Primers for generation of IVT template for XRN-1 siRNA</b> |                                                |
| T7-Aedes_XRN1-1s-F                                            | TCGCAGtaatacgcactactatagggCGAGTTGCCGAAGGAGCCGT |
| T7-Aedes_XRN1-1s-R                                            | GCGGAACATTGGGCGGATGC                           |
| T7-Aedes_XRN1-1a-F                                            | CGAGTTGCCGAAGGAGCCGT                           |
| T7-Aedes_XRN1-1a-R                                            | TCGCAGtaatacgcactactatagggGCGGAACATTGGGCGGATGC |
| T7-Aedes_XRN1-2s-F                                            | TCGCAGtaatacgcactactatagggGCCCATCTAACCGAGGCCA  |
| T7-Aedes_XRN1-2s-R                                            | CCGATCGTCTCGCTCCTCGC                           |
| T7-Aedes_XRN1-2a-F                                            | GCCCATCTAACCGAGGCCA                            |
| T7-Aedes_XRN1-2a-R                                            | TCGCAGtaatacgcactactatagggCGAGTTGCCGAAGGAGCCGT |
| <b>3'UTR cloning primers</b>                                  |                                                |
| PaRV-3UTR T7 F                                                | TAATACGACTCACTATAGGGGaaaccatctttccaaattag      |
| PaRV-3UTR T7 R                                                | AGCGTAATTGGACTAAAACAAACTGACGAGC                |
| PCV-3UTR T7 F                                                 | TAATACGACTCACTATAGGGgaaaaatccttgagcaggag       |
| PCV-3UTR T7 R                                                 | AGACGTAGCCAAGTAAGCTCACAGCAACGC                 |
| BinjV-3UTR T7 F                                               | TAATACGACTCACTATAGGGggatctacgaacgagaataag      |
| BinjV-3UTR T7 R                                               | AGATACTTGATGTTTCTCAATCCCCAATCCACAATT           |
| KRBV-3UTR T7 F                                                | TAATACGACTCACTATAGGGGccaaattacgacgtgtcttg      |
| KRBV-3UTR T7 R                                                | TCTCTCGTGACTCAATCTTTGCTTTTATTTTCACATTGTTAAGG   |
| <b>SHAPE Primers</b>                                          |                                                |
| PaRV_233-FAM                                                  | /56-FAM/CTAGACGTCCTTCGAAACCAGTTCCG             |
| PCV_243-FAM                                                   | /56-FAM/CGTCACAGCCTTATGTGGGACTGGG              |
| BinJV_379-FAM                                                 | /56-FAM/TGTGCCTTGTGGATTGAGTGCTGTG              |
| BinJV_200-FAM                                                 | /56-FAM/CGACGCATTACCACTGGATGGCUG               |
| KRBV_379-FAM                                                  | /56-FAM/AGTGCTCCCAACTCCTTTGCCACC               |
| KRBV_447-FAM                                                  | /56-FAM/CATTGTTAAGGGAGGTGGCGCTG                |
| HVV_187-FAM                                                   | /56-FAM/CGGGCGCCATTCCACTATGAGGTTG              |
| PaRV_233-HEX                                                  | /5HEX/CTAGACGTCCTTCGAAACCAGTTCCG               |
| PCV_243-HEX                                                   | /5HEX/CGTCACAGCCTTATGTGGGACTGGG                |
| BinJV_379-HEX                                                 | /5HEX/TGTGCCTTGTGGATTGAGTGCTGTG                |
| BinJV_200-HEX                                                 | /5HEX/CGACGCATTACCACTGGATGGCUG                 |
| KRBV_379-HEX                                                  | /5HEX/AGTGCTCCCAACTCCTTTGCCACC                 |
| KRBV_447-HEX                                                  | /5HEX/CATTGTTAAGGGAGGTGGCGCTG                  |
| HVV_187-HEX                                                   | /5HEX/CGGGCGCCATTCCACTATGAGGTTG                |
| <b>3'UTR sequencing Primers</b>                               |                                                |
| PaRV_3UTR_Seq F                                               | AGAGACTTGGAGTTGTGGCG                           |
| PaRV_3UTR_Seq R                                               | AGCGTAATTGGACTAAAACAAACTG                      |
| PCV_3UTR_Seq_F                                                | AGTGTGACGATGTAGGCCCG                           |
| PCV_3UTR_Seq_R                                                | AGACGTAGCCAAGTAAGCTCACAGC                      |
| <b>Mutagenesis Primers</b>                                    |                                                |
| PCV_PK1'F                                                     | CTGGGGGAGTctgCCCCCTCCGG                        |
| PCV_PK1'R                                                     | GAGCCATACATTTAGCCAGG                           |
| PCV_PK2'F                                                     | CCCGGGTGCTctgGCCACCCCGA                        |
| PCV_PK2'R                                                     | ATTTCTCCCCCTTGCGATGTTG                         |
| PCV_PK3'F                                                     | CCTGGGCGTTctgGACGCCCCGG                        |
| PCV_PK3'R                                                     | ATTTCTCCTCCTTGCGGTGG                           |
| PaRV_PK1'F                                                    | TCCGGGGTTTgtgGCTCCCCCG                         |
| PaRV_PK1'R                                                    | GAAAATCTCCTGCTGCCG                             |
| PaRV_PK2'F                                                    | CTCGGGGATTgtgGCTCCCCCAT                        |
| PaRV_PK2'R                                                    | ACAAGCTCTGCTGCCATA                             |
| PaRV_PK3'F                                                    | CTCGGGGCTgtgGCACCCCGG                          |
| PaRV_PK3'R                                                    | ACATAAACTCTCTGTTGCCGGATTG                      |
| KRBV_PK1'F                                                    | GATGAGGTGAcaacgGACACCTCCCTGTGAGC               |
| KRBV_PK1'R                                                    | AGTTGCATACAAGAAAGC                             |
| BinJV PK1' F                                                  | CAGCATAATCTCTAAGTGCTGCTGCCTGTG                 |

|                     |                                                                  |
|---------------------|------------------------------------------------------------------|
| BinJV PK1' R        | GCTCATTGAGGCCTGAC                                                |
| BinJV PK2' F        | CCAGGGCTATCCAACCTAAGCCCTGCTG                                     |
| BinJV_PK3' F        | GGAGCAGCAA <sup>Acgag</sup> GAGCTGCATCACCCAC                     |
| BinJV_PK3' R        | TCACCAGTCCCTCCCAAT                                               |
| BinJV PK3' R        | CCTCACCAGTCCCTCCCA                                               |
| BinJV nPK1' F       | AACACGTGGTTCGCCCACTCGTGTTCG                                      |
| BinJV nPK1' R       | AAGGAGAGGCACAGGCAG                                               |
| BinJV_nPK2'F        | CAGTGGTAATCGCAGGCACCACTAAGGATTAATAGACG                           |
| BinJV_nPK2'R        | GATGGCTGCCACAGACAG                                               |
| <b>CPER primers</b> |                                                                  |
| ParV_linkerF        | CAGTTTGTTTTAGTCCAATTACGCTGGGTCGGCATGGCATCTCCAC                   |
| ParV_linkerR        | AACCACGGGTAACTTTTAAAACTGTTTACCAGATCGTTGCGGGC                     |
| ParV_frag1F         | AGTTTTTAAAAAGTTAACCCGTGGTTTTACC                                  |
| ParV_frag1R         | AACCGGTTTGTCTCCCTAGTC                                            |
| ParV_frag2F         | GACTAGGGAGAACAACCGGTT                                            |
| ParV_frag2R         | GTATGCCCTCATTACTAGCCCC                                           |
| ParV_frag3F         | GGGGCTAGTAATGAGGGCATACT                                          |
| ParV_frag3R         | CCTTCTGGCTTCCAACCATACT                                           |
| ParV_frag4F         | AGTATGGTTGGAAGCCAGAAGG                                           |
| ParV_frag4R         | AGCGTAATTGGACTAAAACAACTGA                                        |
| PCV_linker_F        | GTGAGCTTACTTGGCTACGTCTGGGTCGGCATGGCATCTCCAC                      |
| PCV_linker_R        | ACTAACGCAAAAGTTTTTAAAACTGTTTACCAGATCGTTGCGGGC                    |
| PCV_frag1_F         | AGTTTTTAAAAACTTTTTCGTTAGT                                        |
| PCV_frag1_R         | ACTCCTCTCGAACTCTCCATCA                                           |
| PCV_frag2_F         | TGATGGAGAGTTCGAGAGGAGT                                           |
| PCV_frag2_R         | CTCCCAAAGTCACCCCGATAAA                                           |
| PCV_frag3_F         | TTTATCGGGGTGACTTTGGGAG                                           |
| PCV_frag3_R         | TAACGTCAGTGGATGGAAGTGG                                           |
| PCV_frag4_F         | CCACTTCCATCCACTGACGTTA                                           |
| PCV_frag4_R         | AGACGTAGCCAAGTAAGCTCACAG                                         |
| BinJV_5'-E_F        | AACGATCTGGTAAACAGTATATTTTTCGCTG                                  |
| BinJV_5'-E_R        | TCCTATTTCCGATAGGGCACCCACGGTCAC                                   |
| BinJV_1-2B_F        | GTGACCGTGGGTGCCCTATCGGAAATAGGA                                   |
| BinJV_1-2B_R        | CCACAACACAGTCCCCCGCTTGTGTTGATTT                                  |
| BinJV_3-4B_F        | AAATCAAACAAGCGGGGGACTGTGTTGTGG                                   |
| BinJV_3-4B_R        | GGTGGCCTGTAATCCCCCTCCTAGGAACTCC                                  |
| BinJV_NS5-3'_F      | GGAGTTCTAGGAGGGGATTACAGGCCACC                                    |
| BinJV_NS5-3'Junc_R  | CTCGTTCGTAGATCCTTAGATCACATTGCC                                   |
| BinJV_NS5-3'Junc_F  | GGCAATGTGATCTAAGGATCTACGAACGAG                                   |
| BinJV_NS5-3'_R      | TGCCATGCCGACCCAGATACTTGATGTTTC                                   |
| BinJV3'UTR-linker   | TGGATTGGGGATTGAGAAAACATCAAGTATCTGGGTCGGCATGGCATCTCCACCTCCTCGC    |
| Linker-BinJV5'UTR   | GTGTTTTGAAACGCACACGCAAAATATACTGTTTACCAGATCGTTGCGGGCTGTATTTATAGGC |

## References

1. Chapman, E. G. *et al.* The structural basis of pathogenic subgenomic flavivirus RNA (sfRNA) production. *Science*. **344**, 307–310 (2014).
2. Funk, A. *et al.* RNA structures required for production of subgenomic flavivirus RNA. *J. Virol.* **84**, 11407–17 (2010).
3. Jones, R. A. *et al.* Different tertiary interactions create the same important 3D features in a distinct flavivirus xrRNA. *RNA*. **27**, 54–65 (2021).
4. MacFadden, A. *et al.* Mechanism and structural diversity of exoribonuclease-resistant RNA structures in flaviviral RNAs. *Nat. Commun.* **9**, 119 (2018).
